# Supplementary material
Source: Springer Nature journal article supplement (https://www.springerprofessional.de/resource/supplementary/13638_2014_1077_MOESM3_ESM.pdf/11899032)

## Communication Aware Route Selection

Neighbor  
Discovery

Assign Link  
Weights

Route  
Computation

Throughput  
Computation

Trigger Lowest  
Throughput router

PSO

Reconfiguration Using  
Mobility Control

## Position Aware Optimization

Reception Probability  
Computation

## Link Quality Estimation

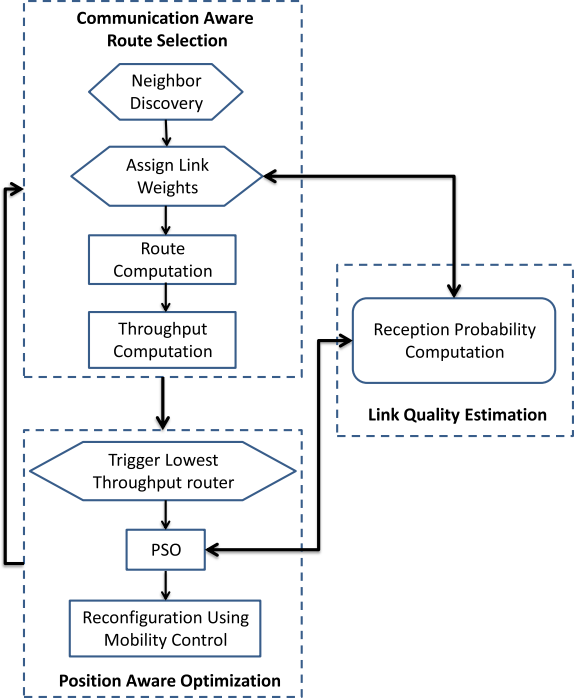

Supplement: MOESM3 [file 11899032]
